# Supplementary material for: Default Pathway of var2csa Switching and Translational Repression in Plasmodium falciparum
Source: PubMed Central journal article supplement (PMC2292259; doi:10.1371/journal.pone.0001982), 2008-04-23
Supplement: pone.0001982.s002.pdf [file pone.0001982.s002.pdf]

**Table S1a.** Genes downregulated at 33 generations and 199 generations (vs. 15 generations) observed in microarray studies.

| PlasmID    | Annotation                  | 15 generations | 33 generations | fold-change | M-value | p-value  |
|------------|-----------------------------|----------------|----------------|-------------|---------|----------|
| PF10_0350  | hypothetical protein        | 3125           | 12625          | 0.25        | -2.01   | 3.16E-06 |
| PF11_0503  | hypothetical protein        | 762.1          | 2372           | 0.32        | -1.64   | 1.85E-05 |
| PF11735c   | hypothetical protein        | 263.5          | 728.8          | 0.36        | -1.47   | 8.11E-05 |
| PFD0630c   | PfEMP1 (PFD0630c)           | 795.4          | 2081           | 0.38        | -1.39   | 5.47E-07 |
| PFD0630c   | PfEMP1 (PFD0630c)           | 1641           | 3900           | 0.42        | -1.24   | 0.00018  |
| PFD0630c   | PfEMP1 (PFD0630c)           | 3401           | 7622           | 0.45        | -1.16   | 6.02E-07 |
| PFI0110c   | protein kinase              | 262.4          | 686.2          | 0.38        | -1.39   | 0.00027  |
| PF11755c   | hypothetical protein        | 263.5          | 678            | 0.39        | -1.36   | 0.000694 |
| PF08_0103  | PfEMP1 (PF08_0103)          | 432.6          | 1077           | 0.40        | -1.32   | 0.000177 |
| PF08_0103  | PfEMP1 (PF08_0103)          | 264            | 564.5          | 0.47        | -1.10   | 0.000683 |
| PFD1185w   | hypothetical protein        | 245.8          | 548.8          | 0.45        | -1.16   | 0.000267 |
| PFA0620c   | glutamate acid rich protein | 669.1          | 1449           | 0.46        | -1.11   | 0.000405 |
| MAL7P1.172 | hypothetical protein        | 1009           | 2144           | 0.47        | -1.09   | 0.000502 |
| MAL7P1.29  | hypothetical protein        | 916.1          | 1899           | 0.48        | -1.05   | 0.000601 |

| PlasmID   | Annotation                                  | 15 generations | 199 generations | fold-change | M-value | p-value |
|-----------|---------------------------------------------|----------------|-----------------|-------------|---------|---------|
| PFB0100c  | knob associated histidine-rich protein      | 60705          | 394             | 0.01        | -7.3    | 0.0242  |
| PFB0100c  | knob associated histidine-rich protein      | 28902          | 212.5           | 0.01        | -7.1    | 0.0242  |
| PFB0100c  | knob associated histidine-rich protein      | 26732          | 235.5           | 0.01        | -6.8    | 0.0242  |
| PFB0100c  | knob associated histidine-rich protein      | 19442          | 179.2           | 0.01        | -6.8    | 0.0242  |
| PFD0630c  | PfEMP1 (PFD0630c)                           | 2795           | 92.75           | 0.03        | -4.9    | 0.0018  |
| PFD0630c  | PfEMP1 (PFD0630c)                           | 1416           | 85.5            | 0.06        | -4.0    | 0.0358  |
| PFD0630c  | PfEMP1 (PFD0630c)                           | 636            | 87.62           | 0.14        | -2.9    | 0.00287 |
| PFB0095c  | PfEMP3                                      | 994.2          | 96.5            | 0.10        | -3.4    | 0.0386  |
| PFD0310w  | sexual stage-specific protein precursor     | 5777           | 840             | 0.15        | -2.8    | 0.0404  |
| PFD0310w  | sexual stage-specific protein precursor     | 7637           | 1,136           | 0.15        | -2.7    | 0.0405  |
| PFD0310w  | sexual stage-specific protein precursor     | 4554           | 691.5           | 0.15        | -2.7    | 0.0405  |
| PF13_0011 | <i>P. falciparum</i> gamete antigen 27/25   | 592.2          | 131             | 0.22        | -2.2    | 0.0421  |
| PFL0795c  | hypothetical protein                        | 409.7          | 93              | 0.23        | -2.1    | 0.0424  |
| PF10_0374 | Pf 11-1 protein                             | 469.3          | 113.8           | 0.24        | -2.0    | 0.0428  |
| PF08_0103 | PfEMP1 (PF08_0103)                          | 356.2          | 98.75           | 0.28        | -1.9    | 0.0439  |
| PF10_0164 | hypothetical protein                        | 636.8          | 180.5           | 0.28        | -1.8    | 0.0443  |
| PF11735c  | hypothetical protein                        | 274.5          | 90.5            | 0.33        | -1.6    | 0.0473  |
| PF14_0010 | glycophorin binding protein-related antigen | 377.9          | 125.2           | 0.33        | -1.6    | 0.0466  |
| PF10_0350 | hypothetical protein                        | 5780           | 2,008           | 0.35        | -1.5    | 0.0477  |
| PF11755c  | hypothetical protein                        | 258.2          | 91.75           | 0.36        | -1.5    | 0.0481  |

**Table S1b.** Genes upregulated at 33 generations and 199 generations (vs. 15 generations) observed in microarray studies.

| PlasmID   | Annotation           | 15 generations | 33 generations | fold-change | M-value | p-value  |
|-----------|----------------------|----------------|----------------|-------------|---------|----------|
| PFL0030c  | PfEMP1 (var2csa)     | 255.9          | 691.2          | 2.70        | 1.4     | 5.63E-05 |
| PFL0030c  | PfEMP1 (var2csa)     | 255.4          | 726.8          | 2.85        | 1.5     | 0.00042  |
| PFL0030c  | PfEMP1 (var2csa)     | 253.6          | 712.2          | 2.81        | 1.5     | 1.10E-05 |
| PF10_0212 | hypothetical protein | 978.3          | 2544           | 2.60        | 1.4     | 0.000572 |
| PFB0365w  | hypothetical protein | 529.6          | 1199           | 2.26        | 1.2     | 0.000295 |
| PFI0160w  | hypothetical protein | 443.9          | 972.8          | 2.19        | 1.1     | 8.28E-05 |

  

| PlasmID       | Annotation                              | 15 generations | 199 generations | fold-change | M-value | p-value  |
|---------------|-----------------------------------------|----------------|-----------------|-------------|---------|----------|
| PFL0030c uORF | PfEMP1 (var2csa)                        | 166.7          | 1974            | 11.8        | 3.6     | 2.42E-07 |
| PFL0030c      | PfEMP1 (var2csa)                        | 191.2          | 4618            | 24.2        | 4.6     | 1.03E-09 |
| PFL0030c      | PfEMP1 (var2csa)                        | 222.6          | 9091            | 40.8        | 5.4     | 4.71E-08 |
| PFL0030c      | PfEMP1 (var2csa)                        | 264.8          | 7780            | 29.4        | 4.9     | 3.03E-09 |
| PFL0030c      | PfEMP1 (var2csa)                        | 228.3          | 8415            | 36.9        | 5.2     | 4.23E-08 |
| PFL0030c      | PfEMP1 (var2csa)                        | 237.4          | 10018           | 42.2        | 5.4     | 1.11E-08 |
| PFE1615c      | hypothetical protein                    | 120.7          | 301             | 2.5         | 1.3     | 0.000145 |
| PF11_0040     | early transcribed membrane protein 11.2 | 8920           | 18290           | 2.1         | 1.0     | 0.00131  |
